# Supplementary material
Source: PubMed Central journal article supplement (PMC3756469)
Supplement: NIHMS492300-supplement-01.pdf [file NIHMS492300-supplement-01.pdf]

**Supplementary Table 1: 44 tag-SNPs of ABCB5**

| <b>SNP</b> | <b>Amino acid substitution</b> | <b>Genotyping call rate</b> | <b>MAF</b> | <b>P for HWE</b> | <b>P for trend</b> |
|------------|--------------------------------|-----------------------------|------------|------------------|--------------------|
| rs10231520 |                                | 0.97                        | 0.38       | 0.463            | 0.026              |
| rs17817117 |                                | 0.98                        | 0.34       | 0.166            | 0.028              |
| rs2301641  | K155E                          | 0.98                        | 0.34       | 0.996            | 0.032              |
| rs7802291  |                                | 0.98                        | 0.34       | 0.993            | 0.100              |
| rs12700234 |                                | 0.98                        | 0.06       | 0.420            | 0.180              |
| rs6950237  |                                | 0.97                        | 0.32       | 0.288            | 0.198              |
| rs10488577 |                                | 0.97                        | 0.13       | 0.191            | 0.204              |
| rs17143272 |                                | 0.98                        | 0.14       | 0.041            | 0.221              |
| rs12669866 |                                | 0.96                        | 0.45       | 0.201            | 0.251              |
| rs7793093  |                                | 0.98                        | 0.14       | 0.343            | 0.271              |
| rs7805806  |                                | 0.98                        | 0.13       | 0.513            | 0.348              |
| rs9638774  |                                | 0.97                        | 0.26       | 0.691            | 0.377              |
| rs4721939  |                                | 0.98                        | 0.30       | 0.756            | 0.406              |
| rs11773053 |                                | 0.98                        | 0.07       | 0.503            | 0.412              |
| rs12700232 |                                | 0.97                        | 0.14       | 0.425            | 0.424              |
| rs6959944  |                                | 0.97                        | 0.13       | 0.436            | 0.427              |
| rs2108258  |                                | 0.97                        | 0.07       | 0.007            | 0.527              |
| rs6461515  | E525K                          | 0.97                        | 0.16       | 0.611            | 0.569              |
| rs17219864 |                                | 0.98                        | 0.36       | 0.807            | 0.594              |
| rs916739   |                                | 0.97                        | 0.18       | 0.039            | 0.599              |
| rs10269525 |                                | 0.97                        | 0.18       | 0.274            | 0.611              |
| rs6974437  |                                | 0.95                        | 0.10       | 0.004            | 0.630              |
| rs6461510  |                                | 0.96                        | 0.11       | 0.685            | 0.637              |
| rs10255466 |                                | 0.98                        | 0.10       | 0.147            | 0.641              |
| rs7780859  |                                | 0.97                        | 0.32       | 0.503            | 0.652              |
| rs2190411  |                                | 0.96                        | 0.29       | 0.472            | 0.656              |
| rs10950831 |                                | 0.98                        | 0.31       | 0.084            | 0.667              |
| rs17143260 |                                | 0.96                        | 0.06       | 0.097            | 0.674              |
| rs17220780 |                                | 0.98                        | 0.15       | 0.501            | 0.693              |
| rs6965084  |                                | 0.96                        | 0.23       | 0.003            | 0.700              |
| rs10230796 |                                | 0.98                        | 0.37       | 0.968            | 0.718              |
| rs10254317 |                                | 0.97                        | 0.42       | 0.614            | 0.729              |
| rs7781446  |                                | 0.92                        | 0.34       | 0.009            | 0.730              |
| rs6461513  |                                | 0.98                        | 0.31       | 0.424            | 0.732              |
| rs2190410  |                                | 0.98                        | 0.32       | 0.947            | 0.753              |
| rs2106563  |                                | 0.98                        | 0.28       | 0.198            | 0.774              |
| rs17819195 |                                | 0.98                        | 0.22       | 0.658            | 0.803              |
| rs10267176 |                                | 0.96                        | 0.04       | 0.916            | 0.806              |
| rs11974407 |                                | 0.98                        | 0.36       | 0.476            | 0.823              |
| rs1108864  |                                | 0.97                        | 0.20       | 0.527            | 0.833              |
| rs10258121 |                                | 0.91                        | 0.36       | 0.111            | 0.885              |
| rs2108259  |                                | 0.98                        | 0.28       | 0.987            | 0.981              |
| rs13225659 |                                | 0.94                        | 0.13       | 0.048            | 0.981              |
| rs10216013 |                                | 0.95                        | 0.22       | 0.000            | 0.984              |
